# Supplementary material for: Development of a Nanoparticle System for Controlled Release in Bioprinted Respiratory Scaffolds
Source: MDPI journal article supplement (doi:10.3390/jfb15010020), 2024-01-12
Supplement: s1 [file s1]

Supplementary Material

# Development of a Nanoparticle System for Controlled Release in Bioprinted Respiratory Scaffolds

Amanda Zimmerling <sup>1,2,\*</sup>, Christina Sunil <sup>1</sup>, Yan Zhou <sup>2</sup> and Xiongbiao Chen <sup>1,3</sup>

<sup>1</sup> Division of Biomedical Engineering, College of Engineering, University of Saskatchewan, Saskatoon, SK S7N 5A9, Canada; ikl420@usask.ca (C.S.); xbc719@usask.ca (X.C.)

<sup>2</sup> Vaccine and Infectious Disease Organization, (VIDO), University of Saskatchewan, Saskatoon, SK S7N 5E3, Canada; yan.zhou@usask.ca

<sup>3</sup> Department of Mechanical Engineering, College of Engineering, University of Saskatchewan, Saskatoon, SK S7N 5A9, Canada

\* Correspondence: [asz694@usask.ca](mailto:asz694@usask.ca)

**Citation:** Zimmerling, A.; Sunil, C.; Zhou, Y.; Chen, X. Development of a Nanoparticle System for Controlled Release in Bioprinted Respiratory Scaffolds. *J. Funct. Biomater.* **2024**, *15*, 20. <https://doi.org/10.3390/jfb15010020>

Academic Editor: Nenad Ignjatovic

Received: 14 November 2023

Revised: 21 December 2023

Accepted: 5 January 2024

Published: 12 January 2024

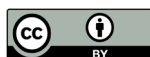

**Copyright:** © 2024 by the authors. Licensee MDPI, Basel, Switzerland. This article is an open access article distributed under the terms and conditions of the Creative Commons Attribution (CC BY) license (<https://creativecommons.org/licenses/by/4.0/>).

Table S1. Materials used in the nanoparticles study.

| Section                                                    | Notes                       | Catalogue Number | Lot #       | Supplier         |
|------------------------------------------------------------|-----------------------------|------------------|-------------|------------------|
| <b>Cell Culture</b>                                        |                             |                  |             |                  |
| Primary Human Bronchial Epithelial Cells                   | cryopreserved               | C12640           | 468Z003     | Promocell        |
| Primary Human Lung Fibroblasts                             | cryopreserved               | C12360           | 446Z031     | Promocell        |
| Airway Epithelial Cell Growth Medium                       |                             | C21060           |             | Promocell        |
| Growth Medium Supplement Mix                               |                             | C39265           |             | Promocell        |
| Human Fibroblast Growth Medium-2                           |                             | C23020           |             | Promocell        |
| Growth Medium 2 Supplemental Mix                           |                             | C39325           |             | Promocell        |
| Anti-Anti                                                  |                             | 15240-062        |             | Gibco            |
| <b>Nanoparticle Preparation</b>                            |                             |                  |             |                  |
| Sodium Alginate                                            | low viscosity               | A1112            |             | Sigma-Aldrich    |
| Hepatocyte Growth Factor                                   |                             | ab259401         | GR3453764-1 | abcam            |
| Paraffin Oil                                               |                             | 18512            |             | Sigma-Aldrich    |
| Span 80                                                    | viscosity 1000-2000 mPa.s   | 85548            |             | Sigma-Aldrich    |
| CaCl <sub>2</sub>                                          |                             | 223506           |             | Sigma-Aldrich    |
| Isopropanol                                                |                             | I9030            | 29996TK     | Sigma-Aldrich    |
| Chitosan                                                   |                             | 448877           |             | Sigma-Aldrich    |
| NaOH                                                       |                             | 1003614357       |             | Sigma-Aldrich    |
| <b>Bioink Preparation</b>                                  |                             |                  |             |                  |
| Sodium Alginate                                            | medium viscosity            | 180947           |             | Sigma-Aldrich    |
| Human Fibroblast Growth Medium-2                           |                             | C23020           |             | Promocell        |
| Collagen                                                   | type 1 bovine methacrylated | 9007-34-5        |             | PhotoCol         |
| Acetic Acid                                                |                             | 351271           | 522112      | Fisher           |
| NaOH                                                       |                             | 1003614357       |             | Sigma-Aldrich    |
| <b>Bioprinting</b>                                         |                             |                  |             |                  |
| Polyethyleneimine                                          |                             | M26B040          | J61270      | Alfa Aesar       |
| <b>Release Studies</b>                                     |                             |                  |             |                  |
| Human HGF ELISA Kit                                        |                             | ab275901         |             | abcam            |
| <b>Cell Viability and Proliferation</b>                    |                             |                  |             |                  |
| Phosphate Buffered Saline                                  | 10x concentrate             | P5493            | SLBX1610    | Sigma            |
| Ethylenediaminetetraacetic Acid Tetrasodium Salt Dihydrate |                             | E6511            |             | Sigma            |
| WST-1                                                      |                             | SKU5015944001    |             | Sigma-Aldrich    |
| <b>Immunostaining</b>                                      |                             |                  |             |                  |
| Paraformaldehyde                                           |                             | CAS:50-00-0      |             | Alfa Aesar       |
| Sucrose                                                    | >99.5%                      | S0389            | SLCJ6927    | Sigma            |
| FSC 22 Clear Frozen Section Compound                       |                             | 3801480          |             | Leica            |
| Isopentane                                                 | >99% purity                 | 78-78-4          |             | ThermoScientific |

|                                         |                              |          |                               |
|-----------------------------------------|------------------------------|----------|-------------------------------|
| Mouse Monoclonal Anit-Vimentin          |                              | ab8069   | abcam                         |
| Rabbit Monoclonal Anit-Pan-Cy-tokeratin |                              | ab234297 | abcam                         |
| Alexa Fluor 595                         | IgG H+L, donkey- anti mouse  | A21207   | Life Technologies             |
| Alexa Fluor 488                         | IgG H+L, donkey- anti rabbit | A21202   | Life Technologies             |
| DAPI                                    |                              | 62248    | ThermoScientific              |
| CitiFluor Mountant Solution             |                              | 17970-25 | Electron Microscopy Sci-ences |
